# Supplementary material
Source: ML conference proceedings conference paper supplement (https://openreview.net/forum?id=4bxBWk9fFW)
Supplement: supplementary_material [file LAVIS_technical_report.pdf › 11896_Supplementary/TaCIR_code/LAVIS/assets/LAVIS_technical_report.pdf]

# This PDF file is protected

You'll need a different reader in order to view this content:

[Download a compatible PDF reader.](#)

This PDF Document has been protected.

The reader you are using does not support opening files protected by Microsoft Office
